# Supplementary figures and images for: The effect of nanometre-sized Au particle loading on TiO2 photocatalysed reduction of bis(2-dipyridyl)disulfide to 2-mercaptopyridine by H2O
Source: Royal Society of Chemistry journal article supplement (doi:10.1039/b007817o), 2001-01-01

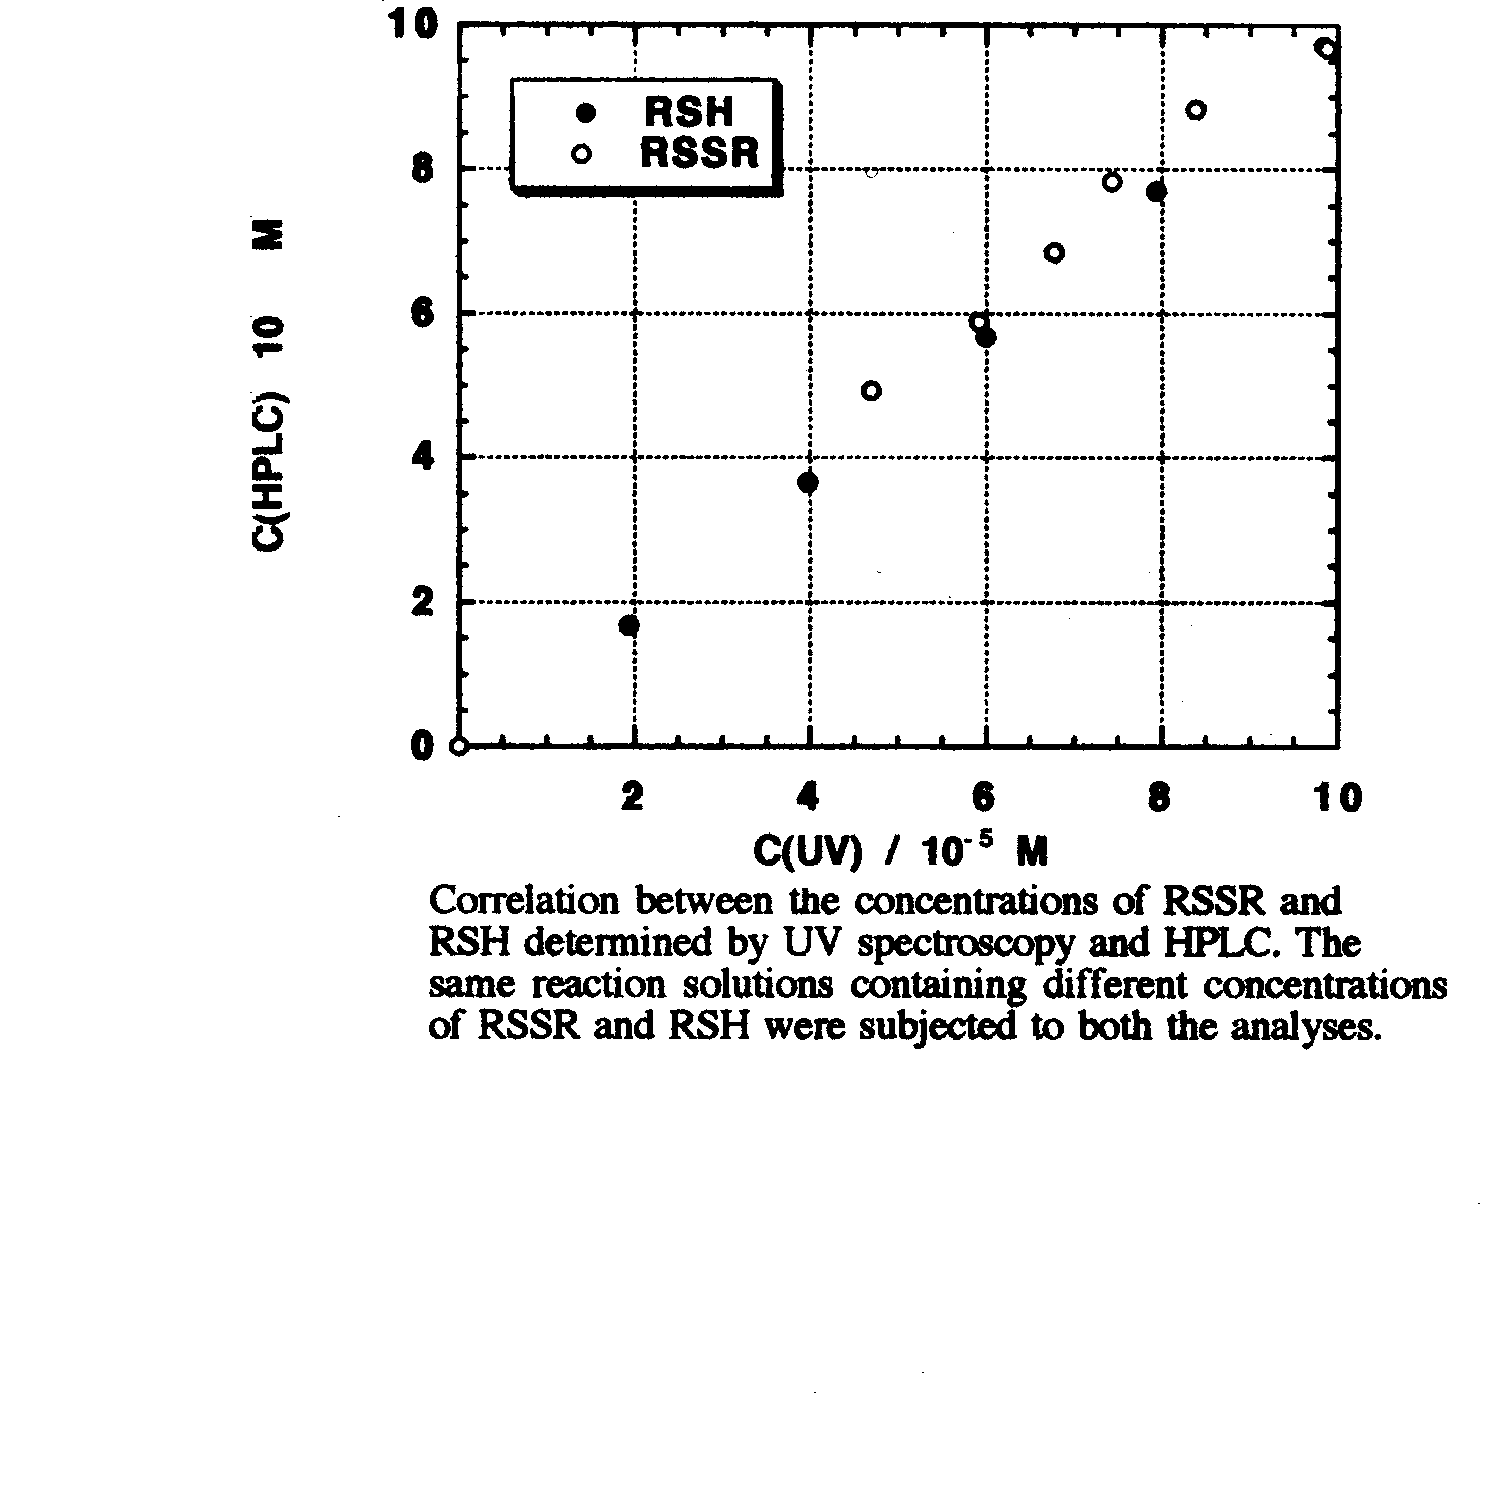

Supplement: table.doc [file table.doc]
